# Supplementary material for: Higher Nevus Count Exhibits a Distinct DNA Methylation Signature in Healthy Human Skin: Implications for Melanoma
Source: PubMed Central journal article supplement (PMC5754330; doi:10.1016/j.jid.2016.11.029), 2017-04
Supplement: mmc1.pdf [file mmc1.pdf]

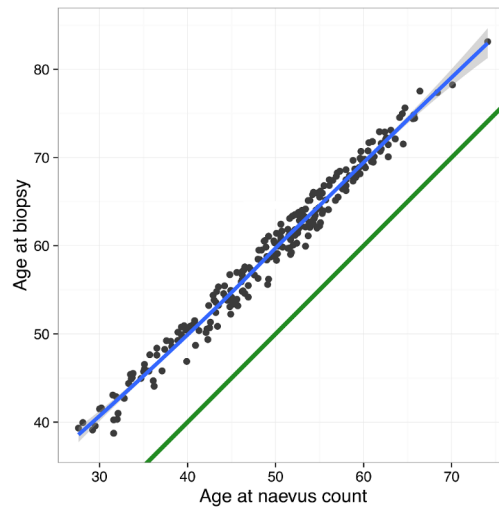

**Figure S1: Age at naevus examination.**

Correlation of chronological ages between naevus examination and skin punch biopsy. The blue line is the true least squares regression fit whereas the green line is a perfect age match.

Table S1. Most associated naevus count differential methylation positions (nDMPs) at FDR 10% or lower.

| Rank | CpG        | Position (hg10) | Associated gene | Location      | CpG Island | Beta    | St. Error | P value  |
|------|------------|-----------------|-----------------|---------------|------------|---------|-----------|----------|
| 1    | cg06244240 | chr17:81058949  | -               | -             | Shore      | 0.0052  | 0.0009    | 5.52E-08 |
| 2    | cg06123942 | chr15:45722796  | C15orf48        | 5'UTR;1stExon | Island     | -0.0074 | 0.0014    | 2.20E-07 |
| 3    | cg25384157 | chr9:140499132  | ARRDC1          | TSS1500       | Shore      | 0.0063  | 0.0012    | 3.06E-07 |
| 4    | cg11297934 | chr3:12705869   | RAF1            | TSS200        | Island     | -0.0046 | 0.0009    | 1.16E-06 |
| 5    | cg14762973 | chr2:187714068  | ZSWIM2          | TSS200        | Island     | 0.0069  | 0.0014    | 1.49E-06 |
| 6    | cg15977816 | chr19:44285297  | KCNN4           | 5'UTR;1stExon | -          | 0.0061  | 0.0013    | 2.23E-06 |
| 7    | cg03755177 | chr7:44349389   | CAMK2B          | Body          | Island     | -0.0066 | 0.0014    | 2.34E-06 |
| 8    | cg01880437 | chr4:26321873   | RBPJ            | TSS1500       | Island     | -0.0057 | 0.0012    | 3.06E-06 |
| 9    | cg02683509 | chr6:156950855  | -               | -             | Shore      | 0.0059  | 0.0012    | 3.22E-06 |
| 10   | cg18401367 | chr5:176107201  | -               | -             | Island     | -0.0063 | 0.0013    | 3.32E-06 |
| 11   | cg11074933 | chr15:26915414  | GABRB3          | Body          | Island     | -0.0063 | 0.0013    | 3.65E-06 |
| 12   | cg03163343 | chr1:45118395   | -               | -             | Shore      | 0.0049  | 0.0010    | 4.72E-06 |
| 13   | cg20093198 | chr19:24182837  | -               | -             | -          | 0.0053  | 0.0011    | 5.11E-06 |
| 14   | cg06569947 | chr13:114126889 | DCUN1D2         | Body          | -          | -0.0060 | 0.0013    | 5.28E-06 |
| 15   | cg09536336 | chr5:168439657  | SLIT3           | Body          | -          | 0.0053  | 0.0012    | 5.70E-06 |
| 16   | cg25343280 | chr2:44314198   | -               | -             | Shore      | 0.0055  | 0.0012    | 6.06E-06 |
| 17   | cg21068480 | chr2:85980500   | ATOH8           | TSS1500       | Island     | 0.0057  | 0.0012    | 6.52E-06 |
| 18   | cg22534759 | chr10:32403029  | -               | -             | Shelf      | 0.0044  | 0.0010    | 6.53E-06 |
| 19   | cg00347643 | chr7:75957202   | YWHAG           | 3'UTR         | Shore      | -0.0053 | 0.0011    | 6.75E-06 |
| 20   | cg02236913 | chr1:20005598   | HTR6            | Body          | Island     | 0.0059  | 0.0013    | 6.81E-06 |
| 21   | cg25720825 | chr1:2849682    | -               | -             | Shore      | 0.0053  | 0.0012    | 7.46E-06 |
| 22   | cg23082845 | chr1:1159282    | SDF4            | Body          | Island     | 0.0056  | 0.0012    | 7.76E-06 |
| 23   | cg14278345 | chr22:50451054  | IL17REL         | 5'UTR;1stExon | Shore      | 0.0046  | 0.0010    | 7.85E-06 |

|    |            |                 |               |               |        |         |        |          |
|----|------------|-----------------|---------------|---------------|--------|---------|--------|----------|
| 24 | cg10139717 | chr8:2363092    | -             | -             | -      | -0.0056 | 0.0012 | 8.11E-06 |
| 25 | cg10929758 | chr2:54857270   | SPTBN1        | Body          | Shore  | 0.0051  | 0.0011 | 8.17E-06 |
| 26 | cg06739855 | chr1:17240204   | -             | -             | Island | -0.0057 | 0.0013 | 8.53E-06 |
| 27 | cg02496234 | chr7:20826128   | SP8           | 5'UTR         | Shore  | 0.0061  | 0.0013 | 8.82E-06 |
| 28 | cg09456289 | chr2:43038399   | -             | -             | Island | -0.0063 | 0.0014 | 9.36E-06 |
| 29 | cg03315230 | chr2:27346938   | ABHD1         | Body          | Shore  | 0.0045  | 0.0010 | 9.61E-06 |
| 30 | cg07821574 | chr19:18208505  | MAST3         | TSS200        | Shore  | -0.0042 | 0.0009 | 9.66E-06 |
| 31 | cg22985929 | chr19:6227536   | MLLT1         | Body          | Shelf  | 0.0050  | 0.0011 | 9.71E-06 |
| 32 | cg04685954 | chr12:10515574  | -             | -             | -      | 0.0043  | 0.0010 | 9.82E-06 |
| 33 | cg20193802 | chr22:19709696  | SEPT5;GP1BB   | Body;TSS1500  | Island | 0.0050  | 0.0011 | 1.01E-05 |
| 34 | cg21220374 | chr9:100396777  | TSTD2;NCBP1   | TSS1500;Body  | Shore  | 0.0058  | 0.0013 | 1.11E-05 |
| 35 | cg19179973 | chr6:83775554   | UBE2CBP       | TSS200        | Island | 0.0040  | 0.0009 | 1.13E-05 |
| 36 | cg04587829 | chr17:80692947  | FN3K          | TSS1500       | Shore  | 0.0048  | 0.0011 | 1.14E-05 |
| 37 | cg01505254 | chr6:36853867   | C6orf89       | Body          | Island | -0.0053 | 0.0012 | 1.18E-05 |
| 38 | cg25369015 | chr1:9599256    | SLC25A33      | TSS1500       | Shore  | -0.0063 | 0.0014 | 1.29E-05 |
| 39 | cg22494876 | chr1:247618161  | -             | -             | Shelf  | 0.0060  | 0.0014 | 1.30E-05 |
| 40 | cg13631572 | chr14:24803903  | ADCY4         | TSS200        | Island | -0.0058 | 0.0013 | 1.35E-05 |
| 41 | cg03166286 | chr9:88555512   | NAA35         | TSS1500       | Shore  | 0.0058  | 0.0013 | 1.36E-05 |
| 42 | cg15375596 | chr15:99434736  | IGF1R         | Body          | Island | 0.0053  | 0.0012 | 1.41E-05 |
| 43 | cg22617002 | chr13:112275633 | -             | -             | Island | 0.0054  | 0.0012 | 1.45E-05 |
| 44 | cg18421356 | chr3:134204114  | ANAPC13;CEP63 | 5'UTR;TSS1500 | Shore  | -0.0050 | 0.0011 | 1.46E-05 |
| 45 | cg13650689 | chr19:54618596  | PRPF31;TFPT   | TSS200;Body   | Shore  | -0.0049 | 0.0011 | 1.48E-05 |
| 46 | cg10339152 | chr20:749452    | C20orf54      | TSS1500       | -      | 0.0041  | 0.0009 | 1.53E-05 |
| 47 | cg02208506 | chr17:4634804   | MED11         | 1stExon       | Island | -0.0055 | 0.0013 | 1.55E-05 |
| 48 | cg12836303 | chr11:63756920  | OTUB1         | Body          | Shelf  | 0.0059  | 0.0013 | 1.55E-05 |

Table S2. Most associated naevus count differential methylation regions (nDMRs) with  $P$  value < 0.01.

| Rank | Position (hg 19)          | Associated Gene      | Location       | CpG Island | Number of CpG sites | DNA methylation | $P$ value | Overview direction CpG sites |
|------|---------------------------|----------------------|----------------|------------|---------------------|-----------------|-----------|------------------------------|
| 1    | chr9:140499132-140500813  | ARRDC1               | TSS1500-Body   | Island     | 7                   | +               | 2.6E-05   | ++----++                     |
| 2    | chr10:14647154-14647530   | FAM107B              | Body           | Shore      | 3                   | +               | 2.5E-04   | +++                          |
| 3    | chr19:44285297-44285568   | KCNN4                | TSS200-1stExon | -          | 3                   | +               | 2.9E-04   | +++                          |
| 4    | chr17:8129997-8130356     | CTC1                 | 3'UTR          | Shelf      | 3                   | -               | 6.3E-04   | ---                          |
| 5    | chr15:26915414-26915752   | GABRB3               | Body           | Island     | 3                   | -               | 8.3E-04   | ---                          |
| 6    | chr1:165513318-165513343  | LOC400794;<br>LRRC52 | Body;TSS200    | -          | 3                   | +               | 9.6E-04   | +++                          |
| 7    | chr7:44349389-44349389    | CAMK2B               | Body           | Island     | 1                   | -               | 1.2E-03   | -                            |
| 8    | chr8:130995990-130996123  | -                    | -              | Island     | 3                   | -               | 1.2E-03   | ---                          |
| 9    | chr13:114126889-114126889 | DCUN1D2              | Body           | -          | 1                   | -               | 1.3E-03   | -                            |
| 10   | chr11:64739320-64739343   | -                    | -              | Island     | 3                   | -               | 1.8E-03   | ---                          |
| 11   | chr10:102279455-102279694 | SEC31B               | TSS200-5'UTR   | Island     | 3                   | -               | 2.2E-03   | ---                          |

|    |                           |           |                |        |   |   |         |      |
|----|---------------------------|-----------|----------------|--------|---|---|---------|------|
| 12 | chr19:43968133-43968495   | LYPD3     | Body           | Island | 2 | - | 2.2E-03 | --   |
| 13 | chr2:4600947-4601053      | -         | -              | -      | 3 | + | 2.5E-03 | +++  |
| 14 | chr20:5485270-5485294     | LOC149837 | TSS200         | -      | 3 | - | 2.6E-03 | ---  |
| 15 | chr7:152063901-152063974  | MLL3      | Body           | Island | 3 | - | 2.6E-03 | ---  |
| 16 | chr7:98030324-98030641    | BAIAP2L1  | TSS1500-TSS200 | Shore  | 4 | + | 2.8E-03 | +++  |
| 17 | chr1:151693222-151693261  | C1orf230  | TSS1500        | Shore  | 2 | - | 2.8E-03 | --   |
| 18 | chr1:17240204-17240204    | -         | -              | Island | 1 | - | 2.9E-03 | -    |
| 19 | chr8:82633130-82633568    | ZFAND1    | TSS200-Body    | Island | 4 | - | 3.0E-03 | -+-- |
| 20 | chr11:102576469-102576508 | MMP27     | TSS200         | -      | 2 | + | 3.4E-03 | ++   |
| 21 | chr2:85980500-85980500    | ATOH8     | TSS1500        | Island | 1 | + | 3.4E-03 | +    |
| 22 | chr1:27729801-27729992    | -         | -              | -      | 2 | + | 3.5E-03 | ++   |
| 23 | chr14:38091400-38091470   | -         | -              | Shore  | 2 | - | 3.8E-03 | --   |
| 24 | chr4:26321873-26321873    | RBPJ      | TSS1500        | Island | 1 | - | 3.8E-03 | -    |
| 25 | chr12:1905735-            | CACNA2D4  | Body           | Island | 2 | + | 3.8E-03 | ++   |

|    |                          |           |           |        |   |   |         |      |
|----|--------------------------|-----------|-----------|--------|---|---|---------|------|
|    | 1906097                  |           |           |        |   |   |         |      |
| 26 | chr18:56296449-56296607  | ALPK2     | TSS1500   | -      | 4 | + | 3.9E-03 | ++++ |
| 27 | chr22:45598944-45599059  | C22orf9   | Body      | Island | 2 | + | 3.9E-03 | ++   |
| 28 | chr1:9599256-9599276     | SLC25A33  | TSS1500   | Shore  | 2 | - | 4.2E-03 | --   |
| 29 | chr7:105331648-105331690 | ATXN7L1   | Body      | -      | 2 | - | 4.2E-03 | --   |
| 30 | chr16:2502146-2502146    | CCNF      | Body      | -      | 1 | - | 4.4E-03 | -    |
| 31 | chr1:1159282-1159282     | SDF4;SDF4 | Body;Body | Island | 1 | + | 4.8E-03 | +    |
| 32 | chr1:43770557-43770707   | TIE1      | Body      | Island | 2 | - | 5.1E-03 | --   |
| 33 | chr17:4634804-4634804    | MED11     | 1stExon   | Island | 1 | - | 5.5E-03 | -    |
| 34 | chr1:162039224-162039224 | NOS1AP    | TSS1500   | Shore  | 1 | - | 5.6E-03 | -    |
| 35 | chr14:65016591-65016602  | C14orf50  | TSS200    | Island | 3 | + | 5.9E-03 | +++  |
| 36 | chr12:54132255-54132568  | -         | -         | Shore  | 3 | - | 6.4E-03 | ---  |
| 37 | chr17:6347533-6347533    | FAM64A    | TSS1500   | Island | 1 | - | 6.7E-03 | -    |
| 38 | chr2:44314198-44314198   | -         | -         | Shore  | 1 | + | 6.9E-03 | +    |

|    |                          |                    |                   |        |   |   |         |         |
|----|--------------------------|--------------------|-------------------|--------|---|---|---------|---------|
| 39 | chr16:28565199-28565206  | CCDC101            | TSS200            | Island | 2 | - | 7.2E-03 | --      |
| 40 | chr4:55092375-55092556   | -                  | -                 | Shore  | 2 | + | 7.4E-03 | ++      |
| 41 | chr7:152456579-152456597 | ACTR3B             | TSS1500           | Shore  | 2 | + | 8.2E-03 | ++      |
| 42 | chr22:39712694-39712730  | RPL3;SNORD83A;RPL3 | Body;TSS1500;Body | Shelf  | 2 | + | 8.4E-03 | ++      |
| 43 | chr9:100396777-100396777 | TSTD2;NCBP1        | TSS1500;Body      | Shore  | 1 | + | 8.9E-03 | +       |
| 44 | chr17:78865087-78866235  | RPTOR              | Body              | Shore  | 8 | + | 8.9E-03 | +++++++ |
| 45 | chr18:43548144-43548144  | KIAA1632           | TSS1500           | Shore  | 1 | + | 9.1E-03 | +       |
| 46 | chr12:52695412-52695515  | KRT86              | TSS1500-TSS200    | Shore  | 2 | - | 9.4E-03 | --      |
| 47 | chr2:3471345-3471345     | TTC15              | Body              | -      | 1 | + | 9.7E-03 | +       |
| 48 | chr6:31743928-31743952   | C6orf27            | Body              | -      | 2 | + | 9.8E-03 | ++      |

Table S3. Naevus count differentially methylated regions vs expression levels.

| Rank | Position (hg 19)         | Associated Gene    | Location          | DNA methylation | Transcript   | Associated Gene | Correlation | P value |
|------|--------------------------|--------------------|-------------------|-----------------|--------------|-----------------|-------------|---------|
| 3    | chr19:44285297-44285568  | KCNN4              | TSS200-1stExon    | +               | ILMN_1709937 | KCNN4           | 0.19        | 2.9E-03 |
| 13   | chr2:4600947-4601053     | -                  | -                 | +               | ILMN_1692706 | DCUN1D2         | -0.14       | 0.033   |
| 17   | chr1:151693222-151693261 | C1orf230           | TSS1500           | -               | ILMN_1681234 | TNRC4           | 0.13        | 0.037   |
| 19   | chr8:82633130-82633568   | ZFAND1             | TSS200-Body       | -               | ILMN_2087989 | ZFAND1          | 0.14        | 0.025   |
| 33   | chr17:4634804-4634804    | MED11              | 1stExon           | -               | ILMN_1762639 | MED11           | 0.19        | 2.6E-03 |
| 35   | chr14:65016591-65016602  | C14orf50           | TSS200            | +               | ILMN_2153916 | HSPA2           | -0.13       | 0.047   |
| 37   | chr17:6347533-6347533    | FAM64A             | TSS1500           | -               | ILMN_2415292 | AIPL1           | -0.18       | 5.5E-03 |
| 39   | chr16:28565199-28565206  | CCDC101            | TSS200            | -               | ILMN_1810560 | P8              | 0.13        | 0.035   |
| 42   | chr22:39712694-39712730  | RPL3;SNORD83A;RPL3 | Body;TSS1500;Body | +               | ILMN_1653927 | SNORD83A        | 0.13        | 0.034   |
| 46   | chr12:52695412-52695515  | KRT86              | TSS1500-TSS200    | -               | ILMN_1677586 | KRT83           | 0.13        | 0.035   |
| 46   | chr12:52695412-52695515  | KRT86              | TSS1500-TSS200    | -               | ILMN_1801442 | KRT81           | -0.19       | 3.2E-03 |
| 47   | chr2:3471345-            | TTC15              | Body              | +               | ILMN_1693317 | TTC15           | -0.14       | 0.024   |



|    |                        |         |      |   |              |      |       |         |
|----|------------------------|---------|------|---|--------------|------|-------|---------|
|    | 3471345                |         |      |   |              |      |       |         |
| 48 | chr6:31743928-31743952 | C6orf27 | Body | + | ILMN_1696601 | VARs | -0.18 | 5.5E-03 |
| 48 | chr6:31743928-31743952 | C6orf27 | Body | + | ILMN_1755507 | VARs | 0.14  | 0.025   |
| 48 | chr6:31743928-31743952 | C6orf27 | Body | + | ILMN_1810834 | MSH5 | -0.16 | 0.014   |
